# Supplementary material
Source: ML conference proceedings conference paper supplement (https://proceedings.mlr.press/v48/arpitb16.html)
Supplement: Supplementary file 1 [file arpitb16-supp.pdf]

# Appendices

## A. Proofs

**Proposition 1.** Let  $\mathbf{u} = \mathbf{W}\mathbf{x}$  where  $\mathbf{x} \in \mathbb{R}^n$  and  $\mathbf{W} \in \mathbb{R}^{m \times n}$  such that  $\mathbb{E}_{\mathbf{x}}[\mathbf{x}] = \mathbf{0}$  and  $\mathbb{E}_{\mathbf{x}}[\mathbf{x}\mathbf{x}^T] = \sigma^2\mathbf{I}$  ( $\mathbf{I}$  is the identity matrix). Then the covariance matrix of  $\mathbf{u}$  is approximately canonical satisfying,

$$\min_{\alpha} \|\Sigma - \text{diag}(\alpha)\|_F \leq \sigma^2 \sqrt{m(m-1)\mu^2 \sum_{i,j=1;i \neq j}^m \|\mathbf{W}_i\|_2^2 \|\mathbf{W}_j\|_2^2} \quad (15)$$

where  $\Sigma = \mathbb{E}_{\mathbf{u}}[(\mathbf{u} - \mathbb{E}_{\mathbf{u}}[\mathbf{u}])(\mathbf{u} - \mathbb{E}_{\mathbf{u}}[\mathbf{u}])^T]$  is the covariance matrix of  $\mathbf{u}$ ,  $\mu$  is the coherence of the rows of  $\mathbf{W}$ ,  $\alpha \in \mathbb{R}^m$  is the closest approximation of the covariance matrix to a canonical ellipsoid and  $\text{diag}(\cdot)$  diagonalizes a vector to a diagonal matrix. The corresponding optimal  $\alpha_i^* = \sigma^2 \|\mathbf{W}_i\|_2^2 \forall i \in \{1, \dots, m\}$ .

*Proof.* Notice that,

$$\mathbb{E}_{\mathbf{u}}[\mathbf{u}] = \mathbf{W}\mathbb{E}_{\mathbf{x}}[\mathbf{x}] = \mathbf{0} \quad (16)$$

On the other hand, the covariance of  $\mathbf{u}$  is given by,

$$\begin{aligned} \Sigma &= \mathbb{E}_{\mathbf{u}}[(\mathbf{u} - \mathbb{E}_{\mathbf{u}}[\mathbf{u}])(\mathbf{u} - \mathbb{E}_{\mathbf{u}}[\mathbf{u}])^T] = \mathbb{E}_{\mathbf{x}}[(\mathbf{W}\mathbf{x} - \mathbf{W}\mathbb{E}_{\mathbf{x}}[\mathbf{x}])(\mathbf{W}\mathbf{x} - \mathbf{W}\mathbb{E}_{\mathbf{x}}[\mathbf{x}])^T] \\ &= \mathbb{E}_{\mathbf{x}}[\mathbf{W}(\mathbf{x} - \mathbb{E}_{\mathbf{x}}[\mathbf{x}])(\mathbf{x} - \mathbb{E}_{\mathbf{x}}[\mathbf{x}])^T \mathbf{W}^T] \\ &= \mathbf{W}\mathbb{E}_{\mathbf{x}}[(\mathbf{x} - \mathbb{E}_{\mathbf{x}}[\mathbf{x}])(\mathbf{x} - \mathbb{E}_{\mathbf{x}}[\mathbf{x}])^T] \mathbf{W}^T \end{aligned} \quad (17)$$

Since  $\mathbf{x}$  has spherical covariance, the off-diagonal elements of  $\mathbb{E}_{\mathbf{x}}[(\mathbf{x} - \mathbb{E}_{\mathbf{x}}[\mathbf{x}])(\mathbf{x} - \mathbb{E}_{\mathbf{x}}[\mathbf{x}])^T]$  are zero and the diagonal elements are the variance of any individual unit, since all units are identical. Thus,

$$\mathbb{E}_{\mathbf{u}}[(\mathbf{u} - \mathbb{E}_{\mathbf{u}}[\mathbf{u}])(\mathbf{u} - \mathbb{E}_{\mathbf{u}}[\mathbf{u}])^T] = \sigma^2 \mathbf{W}\mathbf{W}^T \quad (18)$$

Thus,

$$\begin{aligned} \|\Sigma - \text{diag}(\alpha)\|_F^2 &= \text{tr}((\sigma^2 \mathbf{W}\mathbf{W}^T - \text{diag}(\alpha))(\sigma^2 \mathbf{W}\mathbf{W}^T - \text{diag}(\alpha))^T) \\ &= \text{tr}(\sigma^4 \mathbf{W}\mathbf{W}^T \mathbf{W}\mathbf{W}^T + \text{diag}(\alpha^2) - 2\sigma^2 \text{diag}(\alpha) \mathbf{W}\mathbf{W}^T) \\ &= \sigma^4 \|\mathbf{W}\mathbf{W}^T\|_F^2 + \sum_{i=1}^m (\alpha_i^2 - 2\sigma^2 \alpha_i \|\mathbf{W}_i\|_2^2) \\ &\leq \sigma^4 \sum_{i=1}^m (\|\mathbf{W}_i\|_2^4) + \sum_{i,j=1;i \neq j}^m m(m-1)\mu^2 \|\mathbf{W}_i\|_2^2 \|\mathbf{W}_j\|_2^2 + \sum_{i=1}^m (\alpha_i^2 - 2\sigma^2 \alpha_i \|\mathbf{W}_i\|_2^2) \end{aligned} \quad (19)$$

$\alpha^2$  in the above equation denotes element-wise square of elements of  $\alpha$ . Finally minimizing w.r.t  $\alpha_i \forall i \in \{1, \dots, m\}$ , leads to  $\alpha_i^* = \sigma^2 \|\mathbf{W}_i\|_2^2$ . Substituting this into equation 19, we get,

$$\|\Sigma - \text{diag}(\alpha)\|_F^2 \leq \sigma^4 \sum_{i,j=1;i \neq j}^m m(m-1)\mu^2 \|\mathbf{W}_i\|_2^2 \|\mathbf{W}_j\|_2^2 \quad (20)$$

□

**Remark 1.** Let  $X \sim \mathcal{N}(0, 1)$  and  $Y = \max(0, X)$ . Then  $\mathbb{E}[Y] = \frac{1}{\sqrt{2\pi}}$  and  $\text{var}(Y) = \frac{1}{2} \left(1 - \frac{1}{\pi}\right)$

*Proof.* For the definition of  $X$  and  $Y$ , we have,

$$\mathbb{E}[Y] = \frac{1}{2} \cdot 0 + \frac{1}{2} \mathbb{E}[Z] = \frac{1}{2} \mathbb{E}[Z] \quad (21)$$

where  $Z$  is sampled from a Half-Normal distribution such that  $Z = |X|$ ; thus  $\mathbb{E}[Z] = \sqrt{\frac{2}{\pi}}$  leading to the claimed result. In order to compute variance, notice that  $\mathbb{E}[Y^2] = 0.5\mathbb{E}[Z^2]$ . Then,

$$\text{var}(Y) = \mathbb{E}[Y^2] - \mathbb{E}[Y]^2 = 0.5\mathbb{E}[Z^2] - \frac{1}{4}\mathbb{E}[Z]^2 = 0.5(\text{var}(Z) + \mathbb{E}[Z]^2) - \frac{1}{4}\mathbb{E}[Z]^2 \quad (22)$$

Substituting  $\text{var}(Z) = 1 - \frac{2}{\pi}$  yields the claimed result.  $\square$

**Remark 2.** Let  $X \sim \mathcal{N}(0, 1)$  and  $Y = \text{PReLU}_a(X)$ . Then  $\mathbb{E}[Y] = (1 - a)\frac{1}{\sqrt{2\pi}}$  and  $\text{var}(Y) = \frac{1}{2} \left( (1 + a^2) - \frac{(1-a)^2}{\pi} \right)$

*Proof.* For the definition of  $X$  and  $Y$ , half the mass of  $Y$  is concentrated on  $\mathbb{R}^+$  with Half-Normal distribution, while the other half of the mass is concentrated on  $\mathbb{R}^{-\text{sign}(a)}$  with Half-Normal distribution scaled with  $|a|$ . Thus,

$$\mathbb{E}[Y] = -\frac{a}{2}\mathbb{E}[Z] + \frac{1}{2}\mathbb{E}[Z] = (1 - a)\frac{1}{2}\mathbb{E}[Z] \quad (23)$$

where  $Z$  is sampled from a Half-Normal distribution such that  $Z = |X|$ ; thus  $\mathbb{E}[Z] = \sqrt{\frac{2}{\pi}}$  leading to the claimed result. Similarly in order to compute variance, notice that  $\mathbb{E}[Y^2] = 0.5\mathbb{E}[(aZ)^2] + 0.5\mathbb{E}[Z^2] = 0.5\mathbb{E}[Z^2](1 + a^2)$ . Then,

$$\begin{aligned} \text{var}(Y) &= \mathbb{E}[Y^2] - \mathbb{E}[Y]^2 = 0.5\mathbb{E}[Z^2](1 + a^2) - (1 - a)^2\frac{1}{4}\mathbb{E}[Z]^2 \\ &= 0.5(1 + a^2)(\text{var}(Z) + \mathbb{E}[Z]^2) - (1 - a)^2\frac{1}{4}\mathbb{E}[Z]^2 \end{aligned} \quad (24)$$

Substituting  $\text{var}(Z) = 1 - \frac{2}{\pi}$  yields the claimed result.  $\square$
